# Supplementary material for: Aluminum and Neurofibrillary Tangle Co-Localization in Familial Alzheimer’s Disease and Related Neurological Disorders
Source: PubMed Central journal article supplement — J Alzheimers Dis. 2020 Oct 27;78(1):139–49. doi: 10.3233/JAD-200838 (PMC7683092; doi:10.3233/jad-200838), 2020-10-27
Supplement: jad-78-jad200838-s001.pdf [file jad-78-jad200838-s001.pdf]

# Supplementary Material

## Aluminum and Neurofibrillary Tangle Co-Localization in Familial Alzheimer's Disease and Related Neurological Disorders

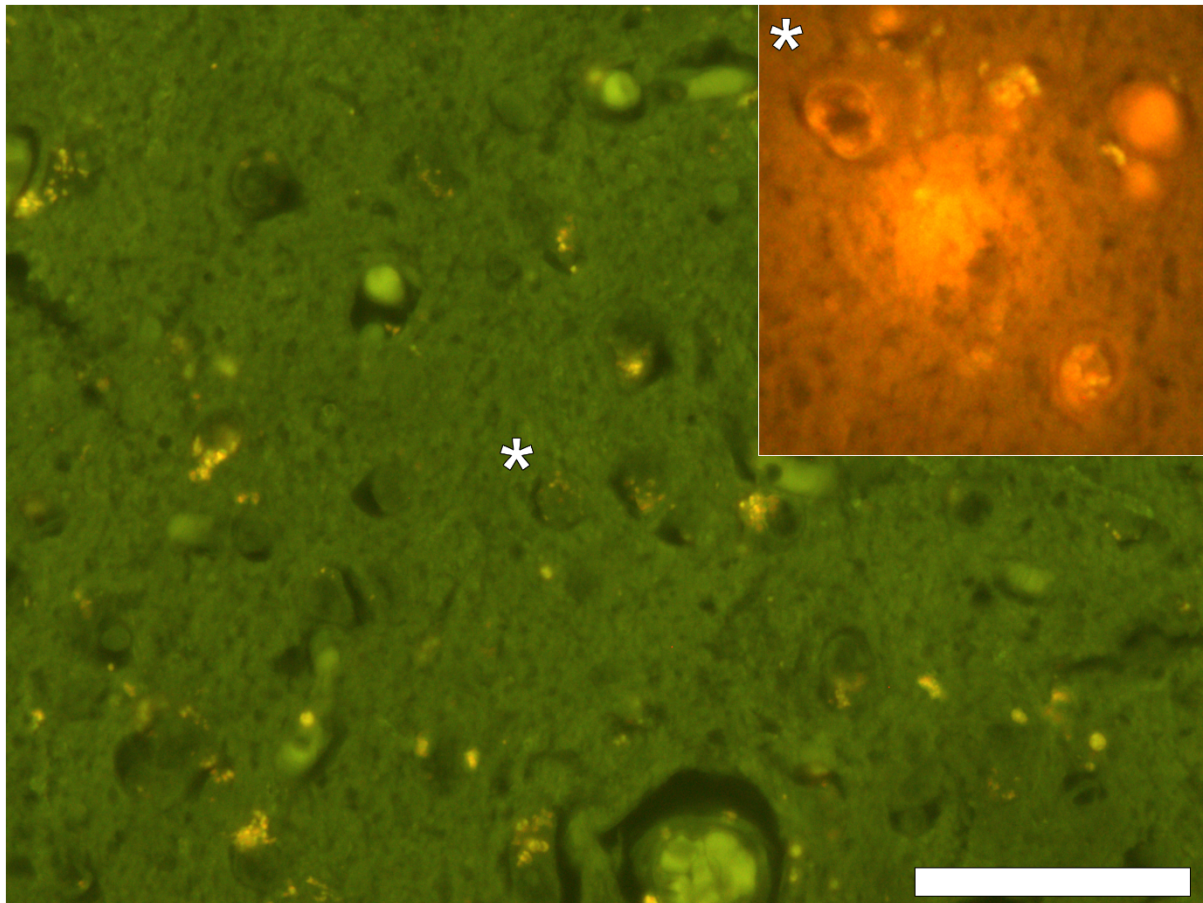

**Supplementary Figure 1.** Autofluorescence of the temporal cortex of a 45-year-old female donor diagnosed with fAD (PSEN1-E280A mutation). Green autofluorescence was noted in the temporal cortex. Punctate deposits of lipofuscin were evident by a yellow fluorescence emission. Lumogallion-reactive intracellular and extracellular deposits of aluminum found in the same region in the adjacent serial section are highlighted (magnified insert, asterisks). Magnification X 400, scale bar: 50  $\mu$ m.

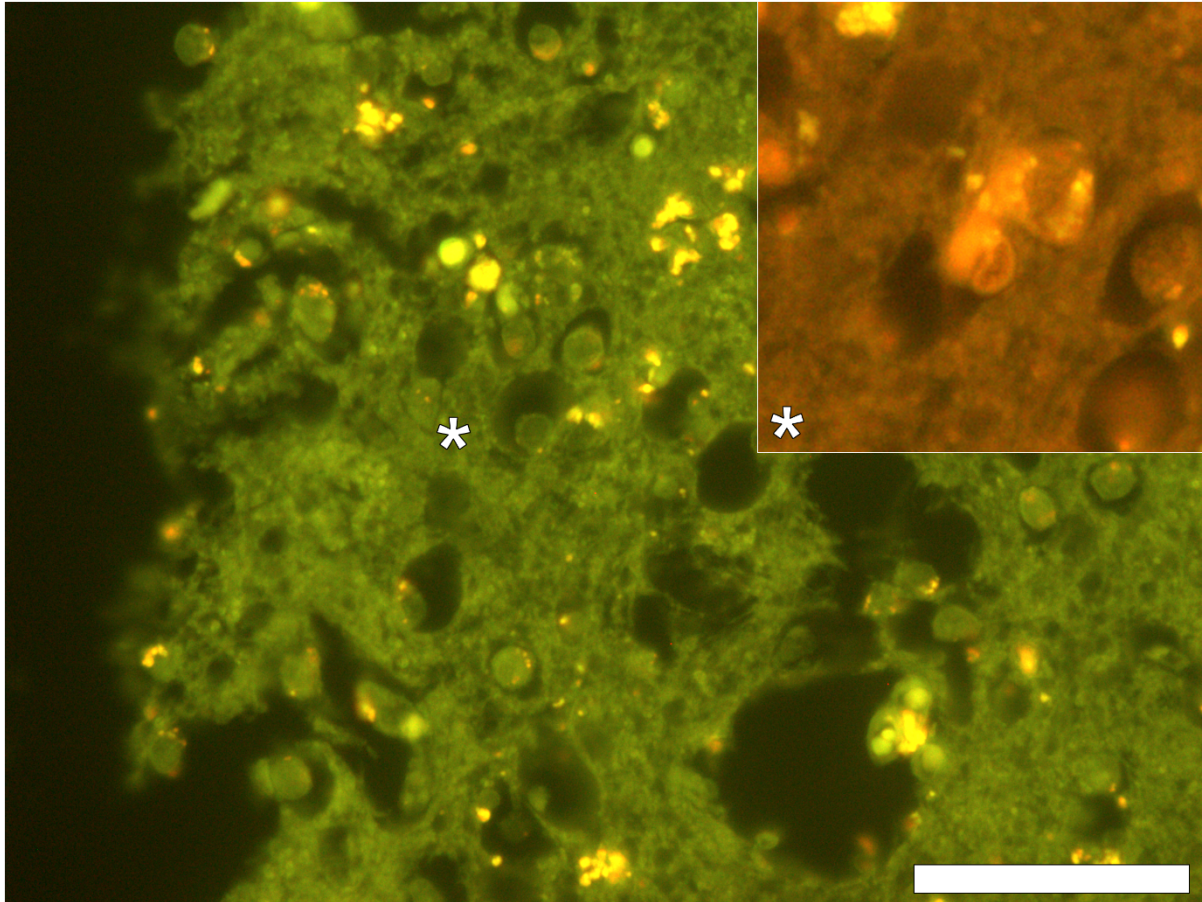

**Supplementary Figure 2.** Autofluorescence of the parietal cortex of a 60-year-old male donor diagnosed with fAD (PSEN1-E280A mutation). Green autofluorescence was noted in the parietal cortex. Punctate deposits of lipofuscin were evident by a yellow fluorescence emission. Lumogallion-reactive intracellular deposits of aluminum in neurons were observed in the same region in the adjacent serial section (magnified insert, asterisks). Magnification X 400, scale bar: 50  $\mu$ m.

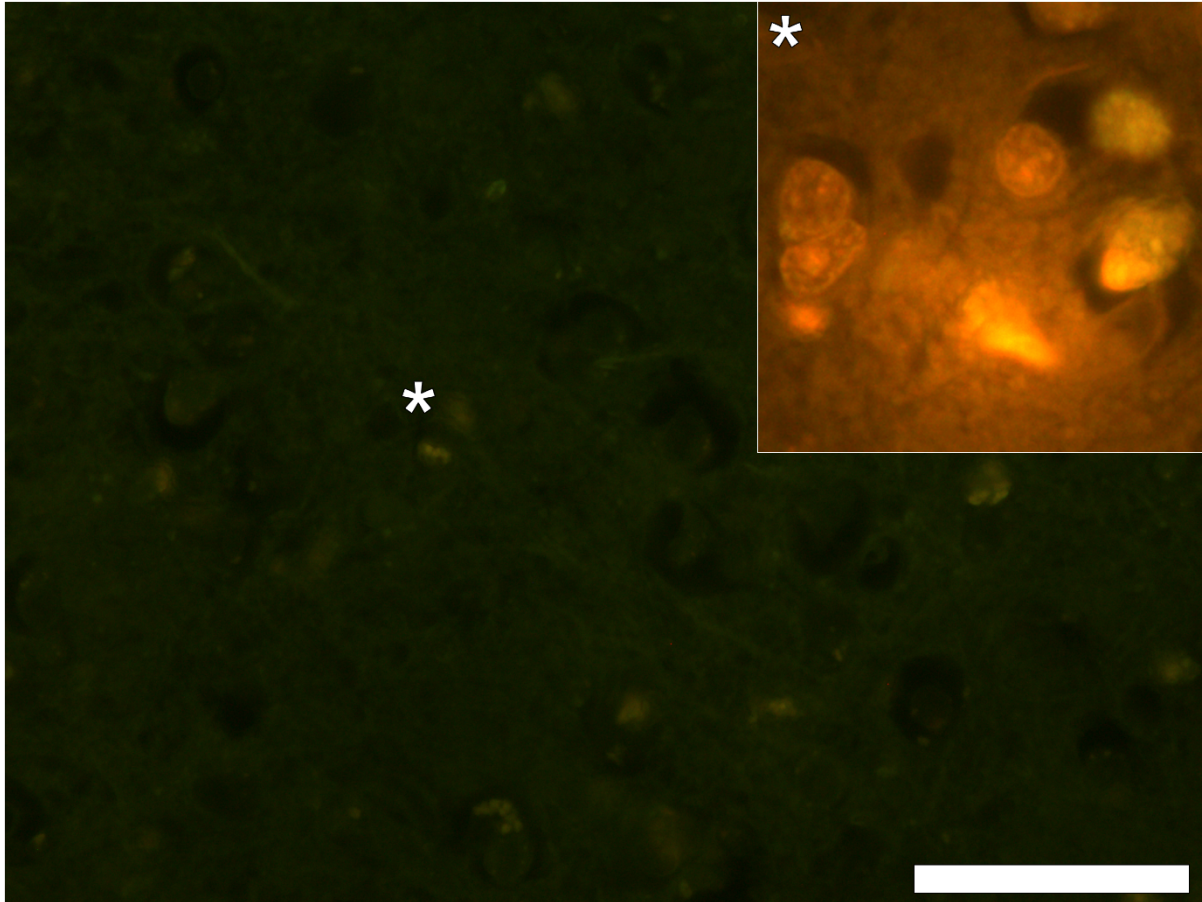

**Supplementary Figure 3.** Autofluorescence of the parietal cortex of a 57-year-old female donor diagnosed with fAD (PSEN1-E280A mutation). Weak green autofluorescence was noted in the parietal cortex. Punctate deposits of lipofuscin were evident by a weak yellow fluorescence emission. Lumogallion-reactive intracellular deposits of aluminum were observed in the same region in the adjacent serial section (magnified insert, asterisks). Magnification X 400, scale bar: 50  $\mu$ m.
